# Supplementary material
Source: PubMed Central journal article supplement (PMC4084746)
Supplement: supp_2.2.E60_2013-0037-1-at.pdf [file supp_2.2.E60_2013-0037-1-at.pdf]

**Appendix 1:** Mean cost estimates over a first year and 5-year period of follow-up after diagnosis of prostate cancer by specific treatment and time to treatment initiation; US and Canadian cost estimates.

\*in US dollars; \*\* in Canadian dollars; Exchange rate: 1 CAD = 0.974 US (Bank of Canada, March 11<sup>th</sup>, 2013); Values are obtained from the model integrating assumptions derived from Keegan et al.<sup>1</sup> (Table 5 in the main article)

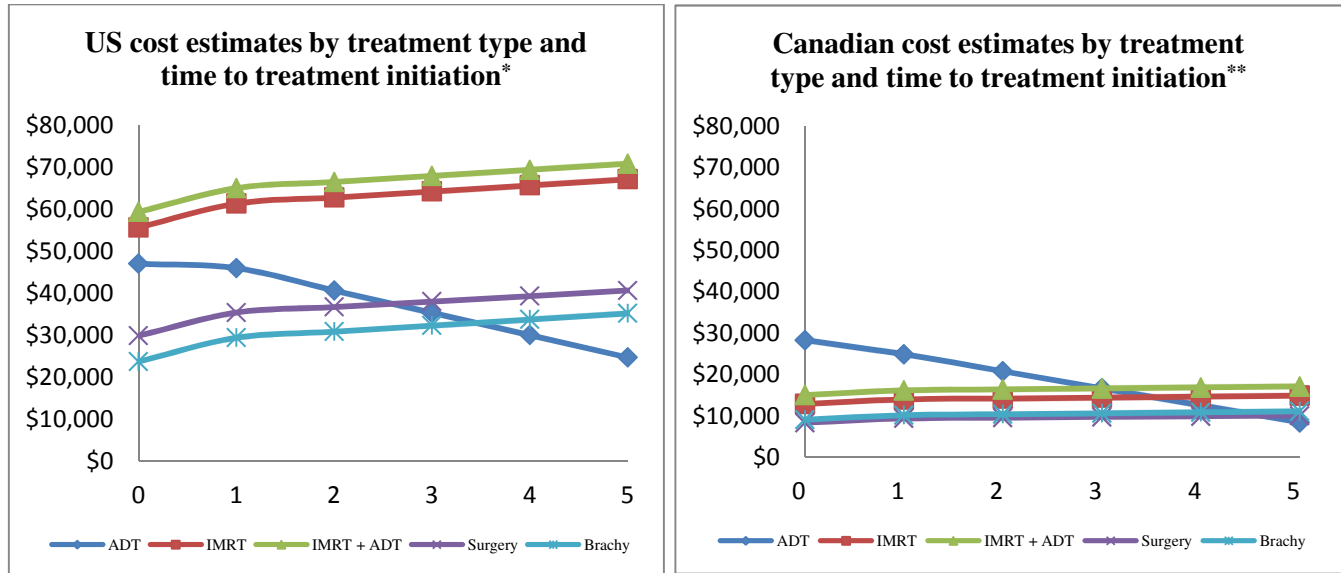

**Reference**

1. Keegan KA, Dall’Era MA, Durbin-Johnson B, et al. Active surveillance for prostate cancer compared with immediate treatment: an economic analysis. *Cancer* 2012;118:3512-8.
